# Supplementary material for: VAHCOLI, a new concept for lidars: technical setup, scienceapplications, and ﬁrst measurements
Source: Copernicus journal article supplement (doi:10.5194/amt-2021-33), 2021-02-10
Supplement: Supplementary file [file amt-2021-33-AC2-supplement.pdf]

2-0  
2-1  
2-2  
  
2-3  
2-4  
  
2-5  
2-6

Reply to reviewer’s comments on the paper

‘VAHCOLI, a new concept for lidars: technical setup, science applications, and first measurements’

submitted to AMT by Franz-Josef Lübken and Josef Höffner

Manuscript Number: amt-2021-33

**Reviewer #2:**

2-7  
2-8  
2-9  
2-10  
2-11

We appreciate the encouraging and positive comments from the reviewer. In particular we are pleased that the reviewer has carefully read our manuscript and considers VAHCOLI a ‘... revolutionary lidar instrument’. Furthermore, we thank the reviewer for his acknowledgement of the fact that ‘... some basic knowledge has been recapitulated to guide the reader.’
